# Supplementary material
Source: PubMed Central journal article supplement (PMC5784432)
Supplement: NIHMS868830-supplement-Supp_info.pdf [file NIHMS868830-supplement-Supp_info.pdf]

# A Online appendix for *Individual Survival Curves Comparing Subjective and Observed Mortality Risks*

## A.1 Derivation of the expected survival probability

We can derive the expected survival probability from age  $a$  to age  $t$  as follows:

$$S_a(t|\mathbf{x}_i) = \int \frac{S(t|\mathbf{x}_i, \nu)}{S(a|\mathbf{x}_i, \nu)} f(v|T > a) dv$$

which, given that

$$f(v|T > a) = S(a|\mathbf{x}_i, \nu) f(v) / S(a|\mathbf{x}_i)$$

yields

$$S_a(t|\mathbf{x}_i) = \frac{1}{S(a|\mathbf{x}_i)} \int S(t|\mathbf{x}_i, \nu) f(v) dv = \frac{S(t|\mathbf{x}_i)}{S(a|\mathbf{x}_i)}.$$

We can use known results for the integration of the hazard over the gamma distribution to obtain a closed-form solution (see for instance Cameron and Trivedi, 2005, pp. 615-616),

$$S_a(t|\mathbf{x}_i) = \left( \frac{\delta + \Lambda(a|\mathbf{x}_i)}{\delta + \Lambda(t|\mathbf{x}_i)} \right)^\delta. \quad (21)$$

## A.2 Distribution of the frailty terms for respondents aged $a$

Given that we need the distribution of survival probabilities to age  $t$  given survival to  $a$  in order to model rounding, denote the conditional distribution of subjective survival rates  $F_s(s^S|T > a, \mathbf{x}_i)$ . To obtain an expression for this distribution, we can use  $F_{\nu_s}(v|T > a, \mathbf{x}_i)$ , the distribution of  $\nu^S$  conditional on surviving to time  $a$ :

$$F_s(s^S|T > a, \mathbf{x}_i) = 1 - F_{\nu_s} \left( -\frac{\ln s^S}{\Lambda_a^S(t|\mathbf{x}_i)} \middle| T > a, \mathbf{x}_i \right).$$

This is due to the fact that for two random variables  $(Y, X)$ , if  $Y = g(X)$ , then  $F(y) = F_X(g^{-1}(y))$ .

Remember that the Gamma distribution  $\mathcal{G}(c, d)$  is given by

$$F(x) = \int_0^x \frac{d^{-c} x^{c-1} \exp\left(-\frac{u}{d}\right)}{\Gamma(c)} du$$

and this distribution has an expected value of  $cd$  and a variance of  $cd^2$ . Notice that if  $d = 1/\delta$  and  $c = \delta$ , the distribution has a unit expectation and a variance of  $1/\delta$ .

Let  $d = \delta^{-1}$  such that  $\nu^S$  at  $a = 0$  is distributed gamma  $\mathcal{G}(\delta, d)$ . Given the value of  $d$ ,  $\nu^S$  has unit expectation. The distribution of  $\nu^S$  conditional on being alive at age  $a$  is:

$$\begin{aligned} F_{\nu^S}(\nu|T > a, \mathbf{x}_i) &= \frac{1}{S^S(a|\mathbf{x}_i)} \int_0^\nu S^S(a|\mathbf{x}_i, u) f(u) du \\ &= \frac{1}{S^S(a|\mathbf{x}_i)} \int_0^\nu \exp(-u\Lambda^S(a|\mathbf{x}_i)) \frac{d^{-\delta} u^{\delta-1} \exp(-\frac{u}{d})}{\Gamma(\delta)} du \\ &= \frac{d^{-\delta}}{S^S(a|\mathbf{x}_i)} \int_0^\nu \frac{u^{\delta-1} \exp(-u(\Lambda^S(a|\mathbf{x}_i) + \delta))}{\Gamma(\delta)} du. \end{aligned}$$

For the sake of exposition, let  $k = 1/(\Lambda^S(a|\mathbf{x}_i) + \delta)$ , and remember that  $S^S(a|\mathbf{x}_i) = (d/k)^{-\delta}$

$$\begin{aligned} F_{\nu^S}(\nu|T > a, \mathbf{x}_i) &= \frac{d^{-\delta}}{S^S(a|\mathbf{x}_i)} \int_0^\nu \frac{u^{\delta-1} \exp(-\frac{u}{k})}{\Gamma(\delta)} du \\ &= \frac{1}{S^S(a|\mathbf{x}_i)} \frac{d^{-\delta}}{k^{-\delta}} \int_0^\nu \frac{k^{-\delta} u^{\delta-1} \exp(-\frac{u}{k})}{\Gamma(\delta)} du \\ &= \int_0^\nu \frac{k^{-\delta} u^{\delta-1} \exp(-\frac{u}{k})}{\Gamma(\delta)} du. \end{aligned}$$

Then it follows directly that  $F_{\nu^S}(\nu|T > a, \mathbf{x}_i)$  is distributed gamma  $\mathcal{G}(\delta, k)$ , leading to an expected value of  $\frac{\delta}{\Lambda^S(a|\mathbf{x}_i) + \delta}$  and a variance of  $\frac{\delta^2}{(\Lambda^S(a|\mathbf{x}_i) + \delta)^2}$ .

This makes explicit that the mean and variance of the frailty term decreases as age increases, as the integrated hazard is expected to increase with age, leading to a decrease in  $k$ .
